# Supplementary material for: ANKS3 Co-Localises with ANKS6 in Mouse Renal Cilia and Is Associated with Vasopressin Signaling and Apoptosis In Vivo in Mice
Source: PubMed Central journal article supplement (PMC4556665; doi:10.1371/journal.pone.0136781), 2015-09-01
Supplement: pone.0136781.s004.pdf [file pone.0136781.s004.pdf]

S1 Table. Design of the antisense oligonucleotides stabilized by Locked Nucleic Acids (LNA). Asterisks indicate phosphorothioate linkage between DNA bases. LNA bases are indicated in parentheses

| <b>Name</b>     | <b>Sequence</b>                          | <b>3' Modification</b>      |
|-----------------|------------------------------------------|-----------------------------|
| ANKS3 LNA ASO_1 | {CAC-AC}T*-C*C*T*-T*C*A*-C*C*A*-{CCT-CA} | Alexa Fluor 647 on Amine C7 |
| ANKS3 LNA ASO_2 | {ACA-CA}C*-T*C*C*-T*T*C*-A*C*C*-{ACC-TC} | Alexa Fluor 647 on Amine C7 |
| ANKS3 LNA ASO_3 | {CAC-AC}A*-C*T*C*-C*T*T*-C*A*C*-{CAC-CT} | Alexa Fluor 647 on Amine C7 |
| SCR LNA ASO     | {CTC-AA}C*-T*C*C*-C*A*T*-C*A*C*-{CCC-AT} | Alexa Fluor 647 on Amine C7 |
